# Supplementary material for: “Off-pore” nucleoporins relocalize heterochromatic breaks through phase separation
Source: PubMed Central journal article supplement — bioRxiv. 2024 Jul 18:2023.12.07.570729. Preprint. [Version 2] doi: 10.1101/2023.12.07.570729 (PMC11275802; doi:10.1101/2023.12.07.570729), 2024-07-18
Supplement: media-1.pdf [file media-1.pdf]

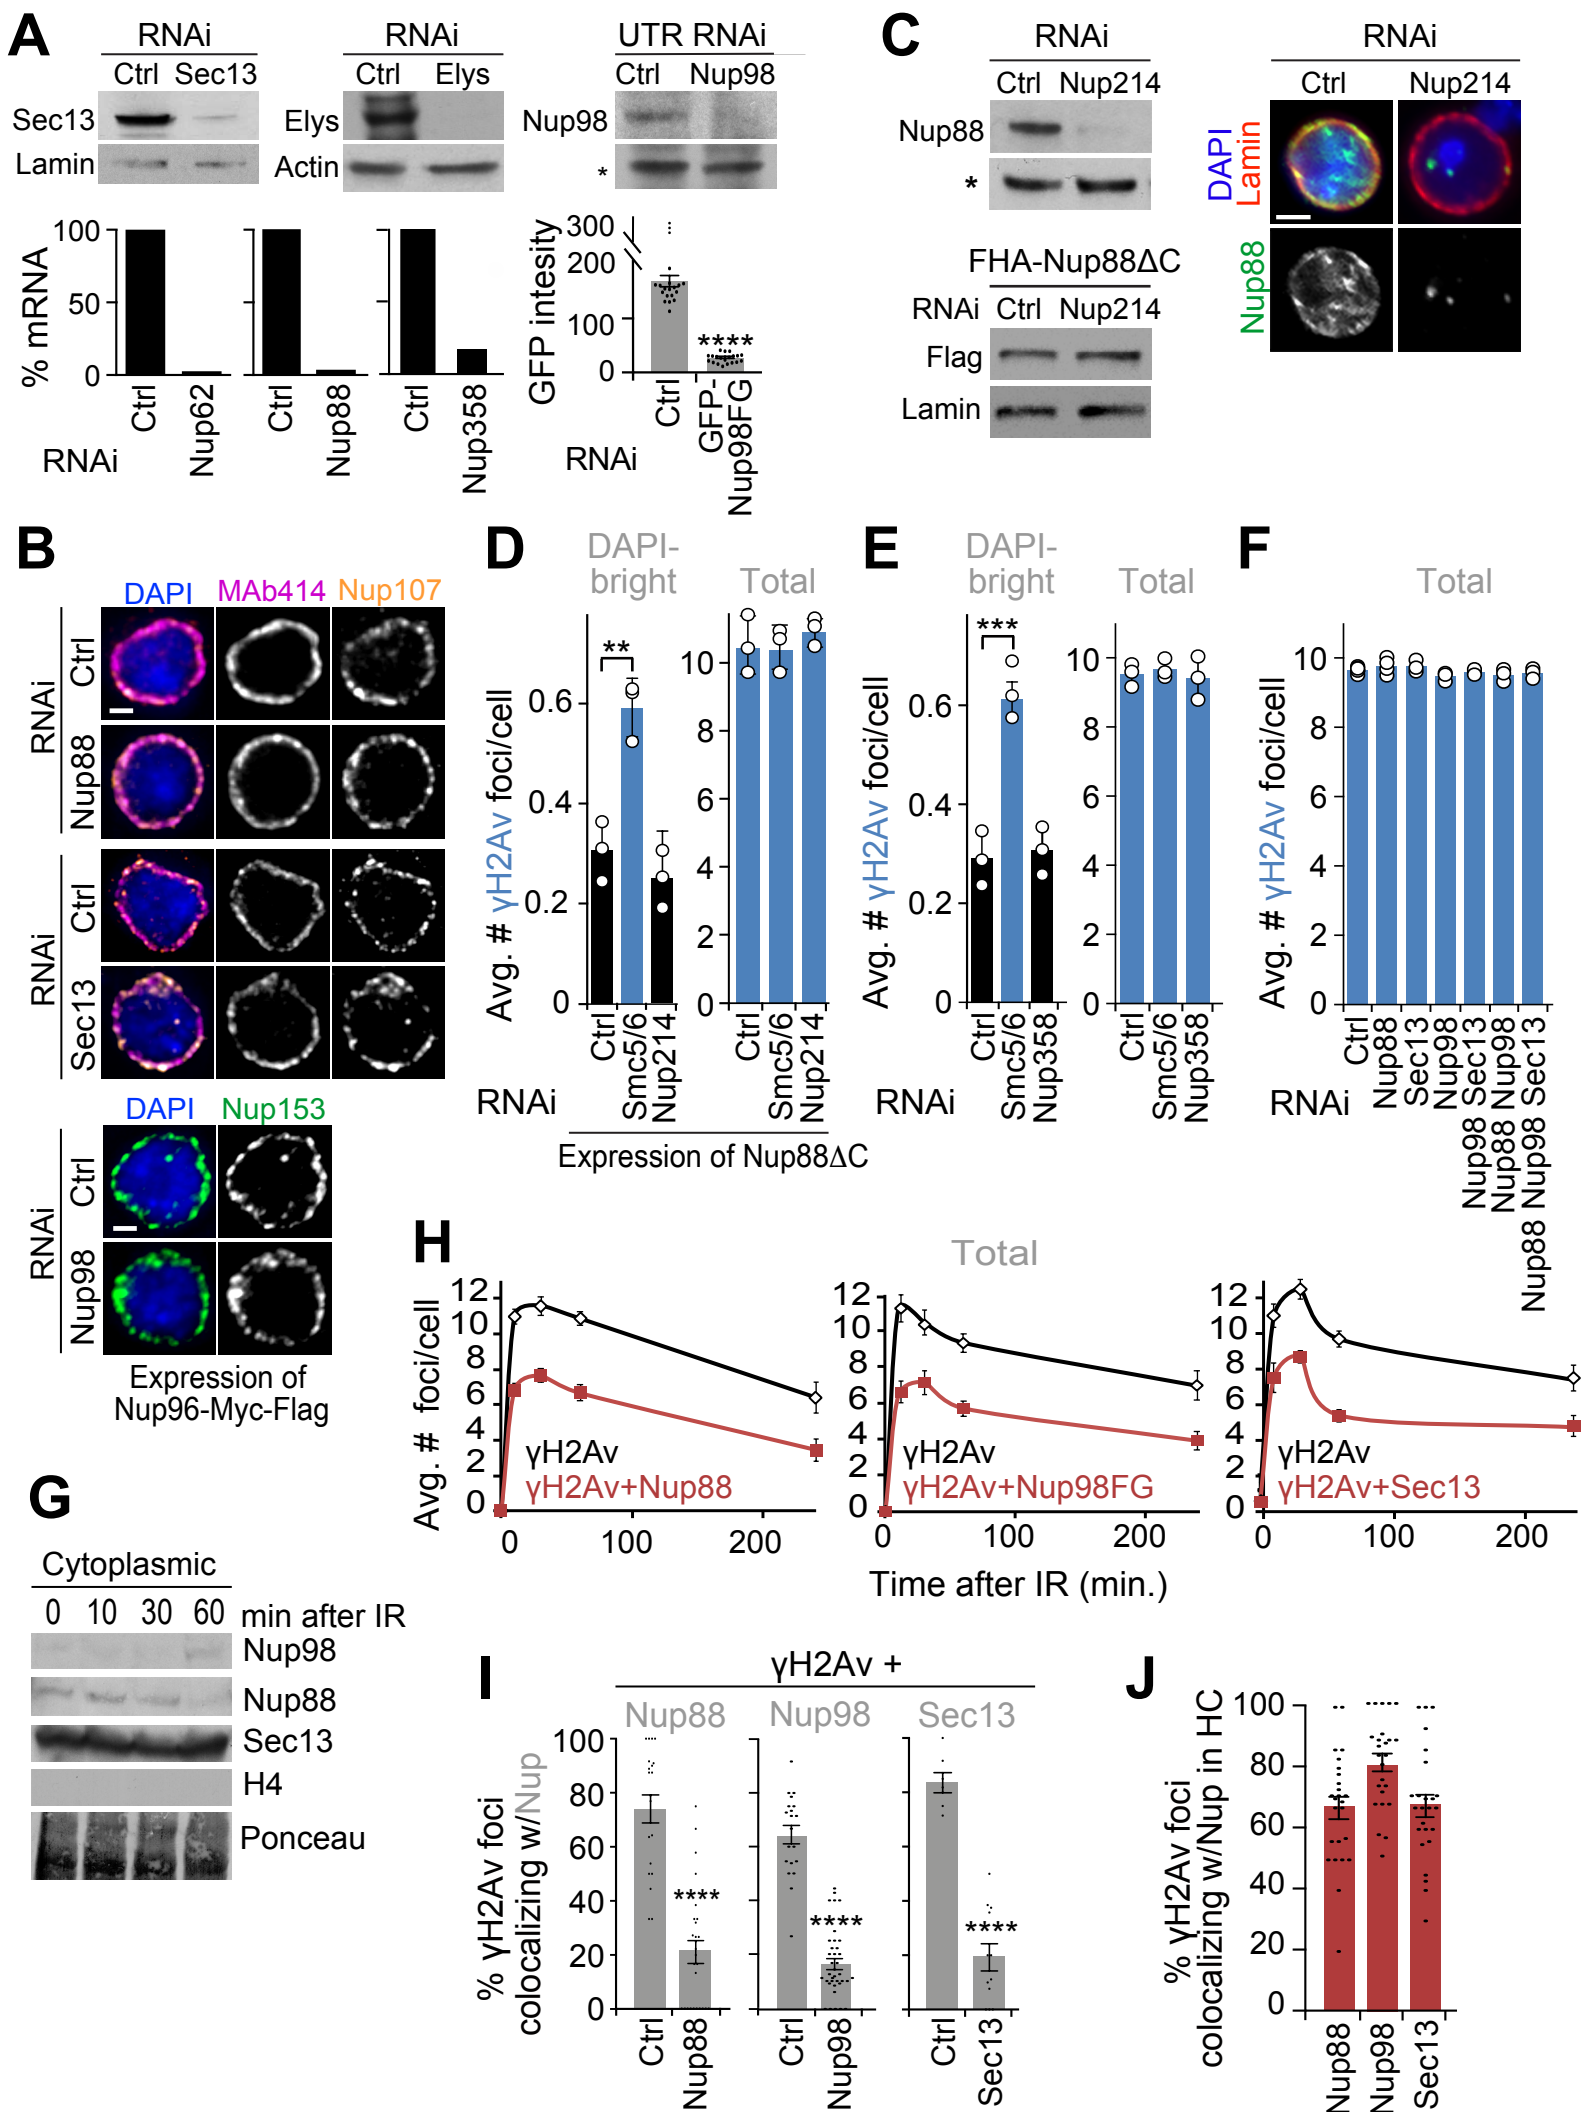

**Figure S1**

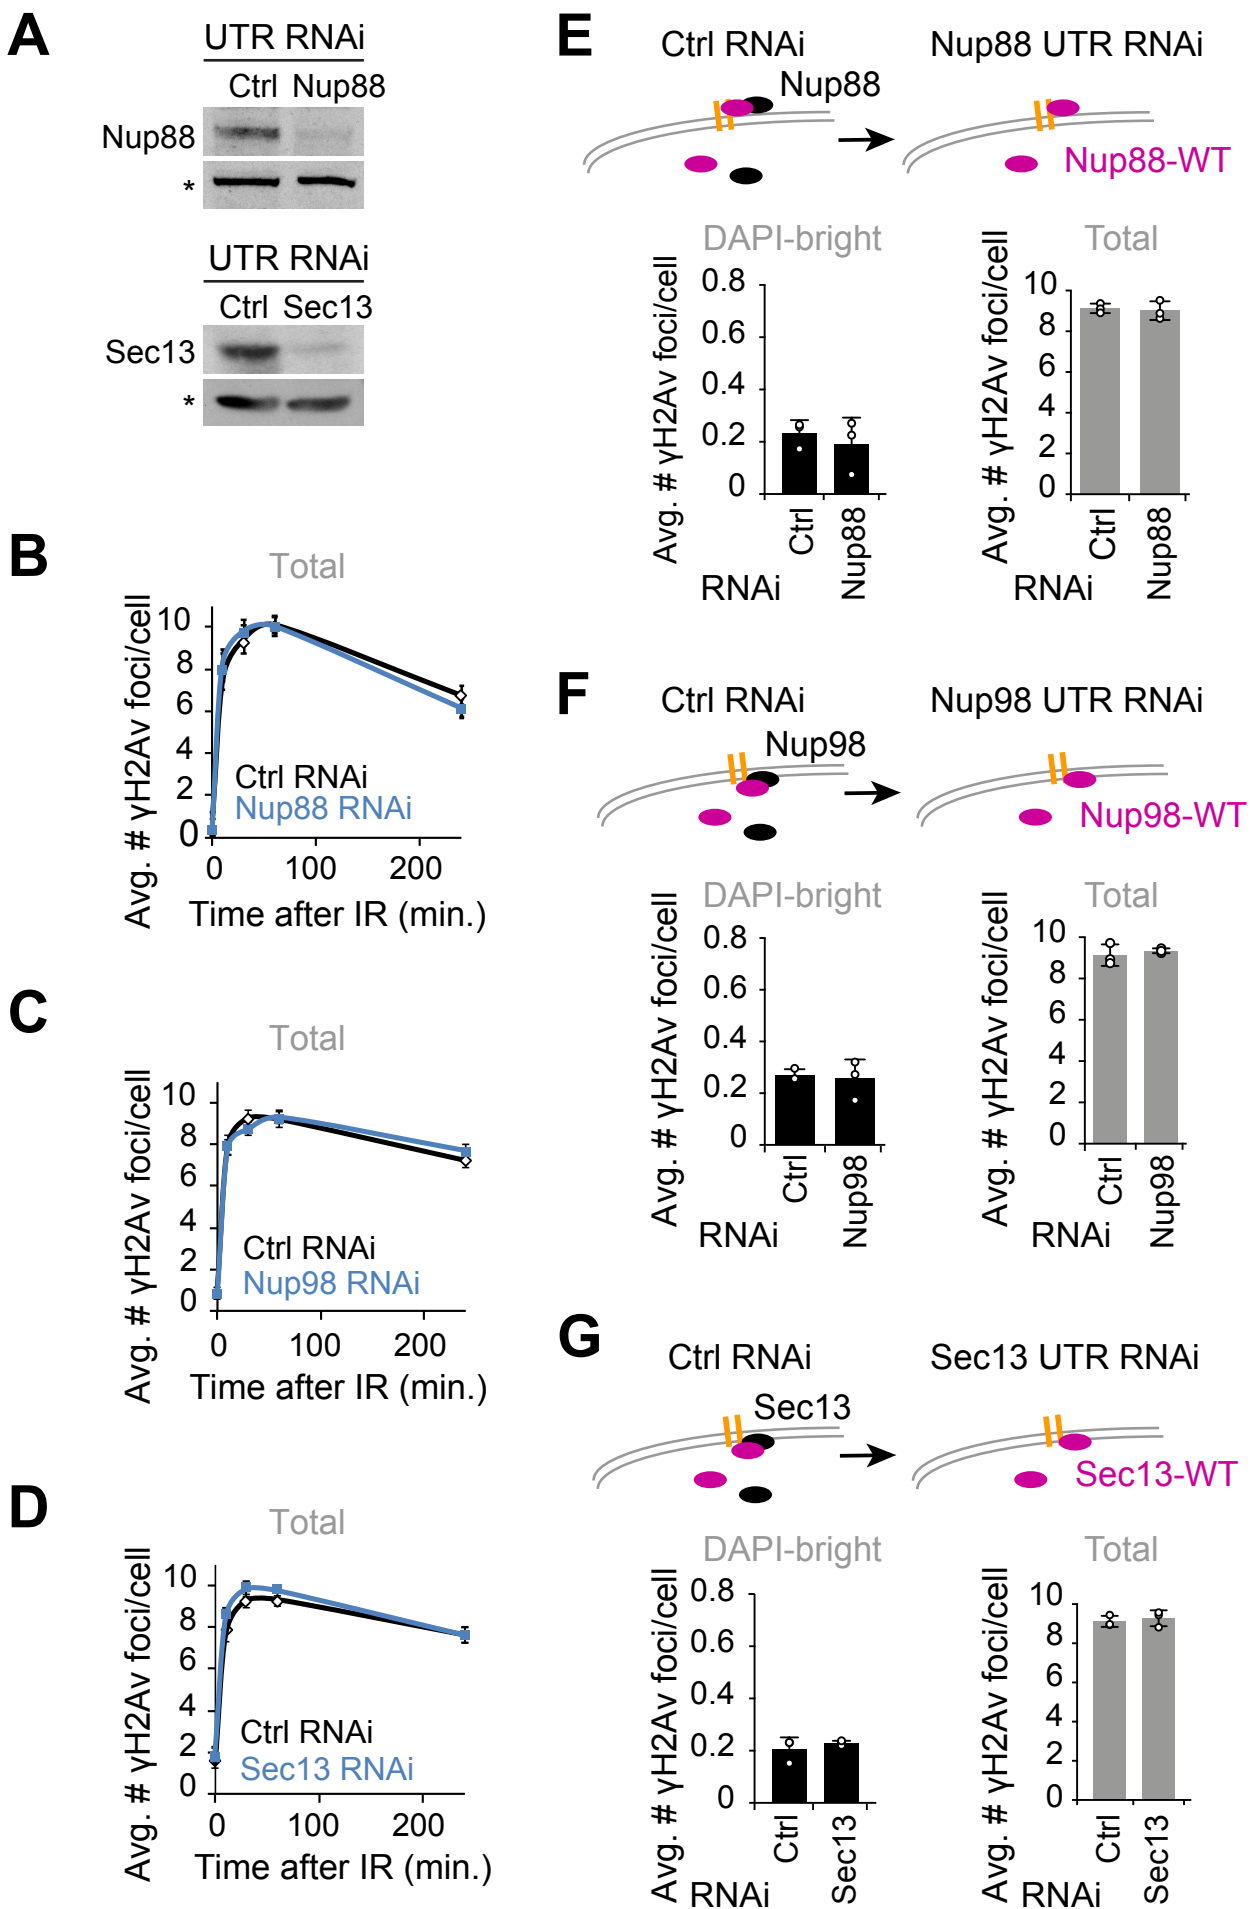

Figure S2

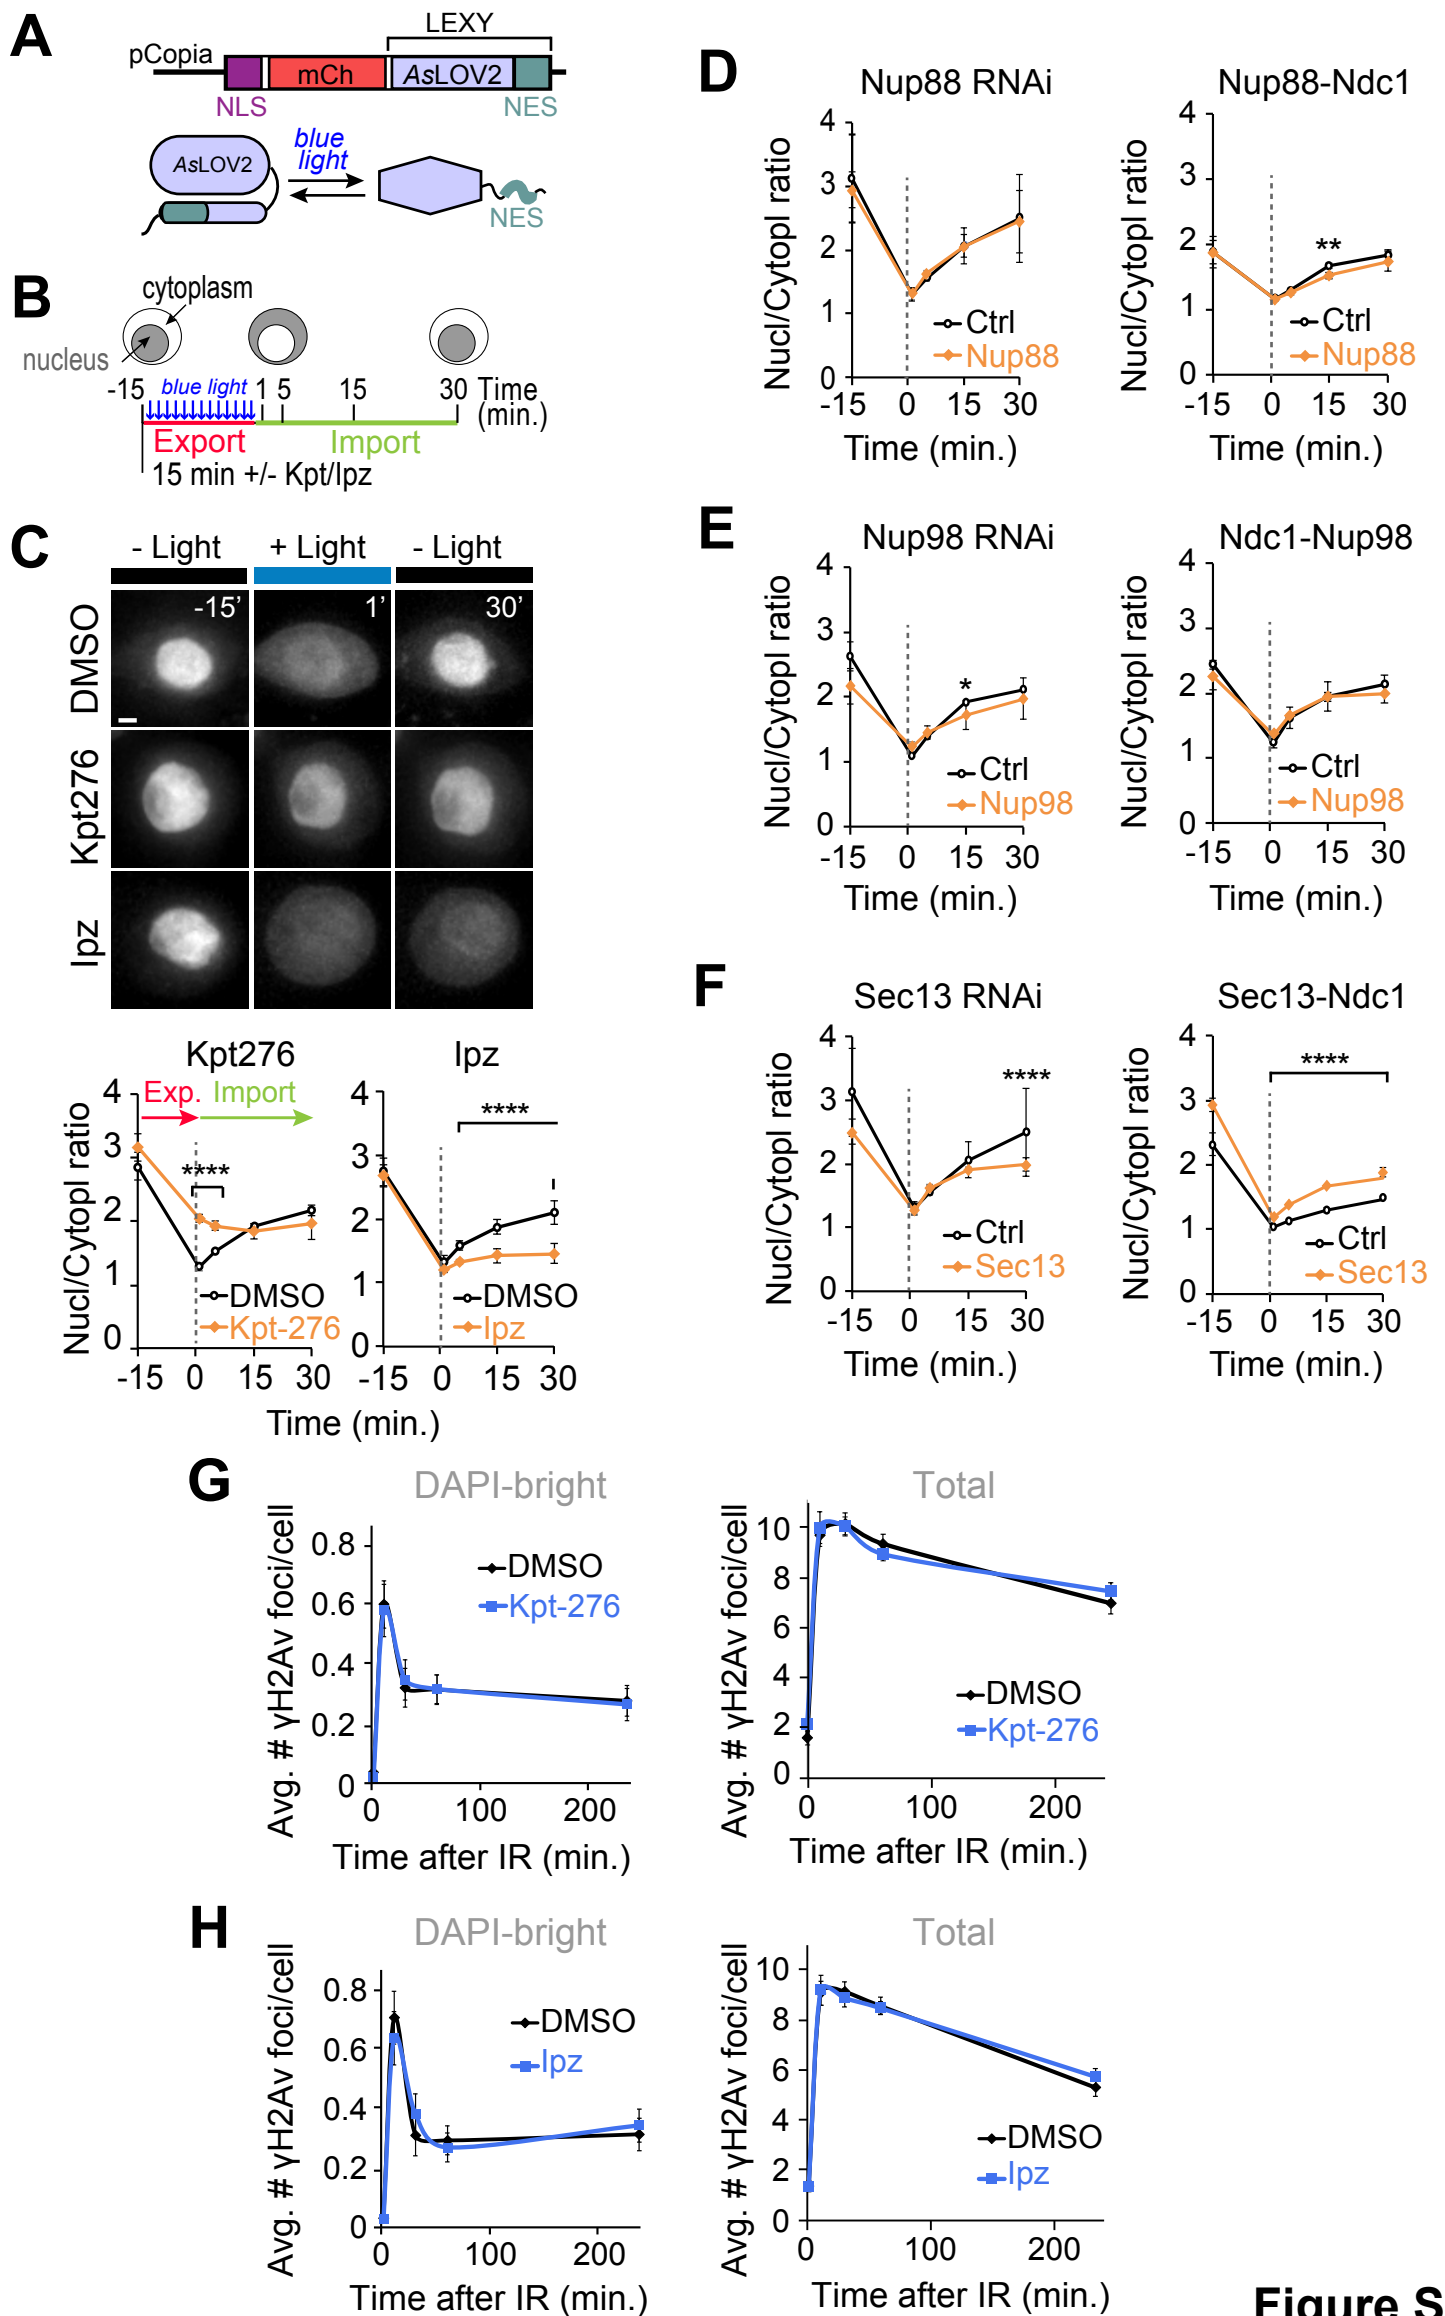

**Figure S3**

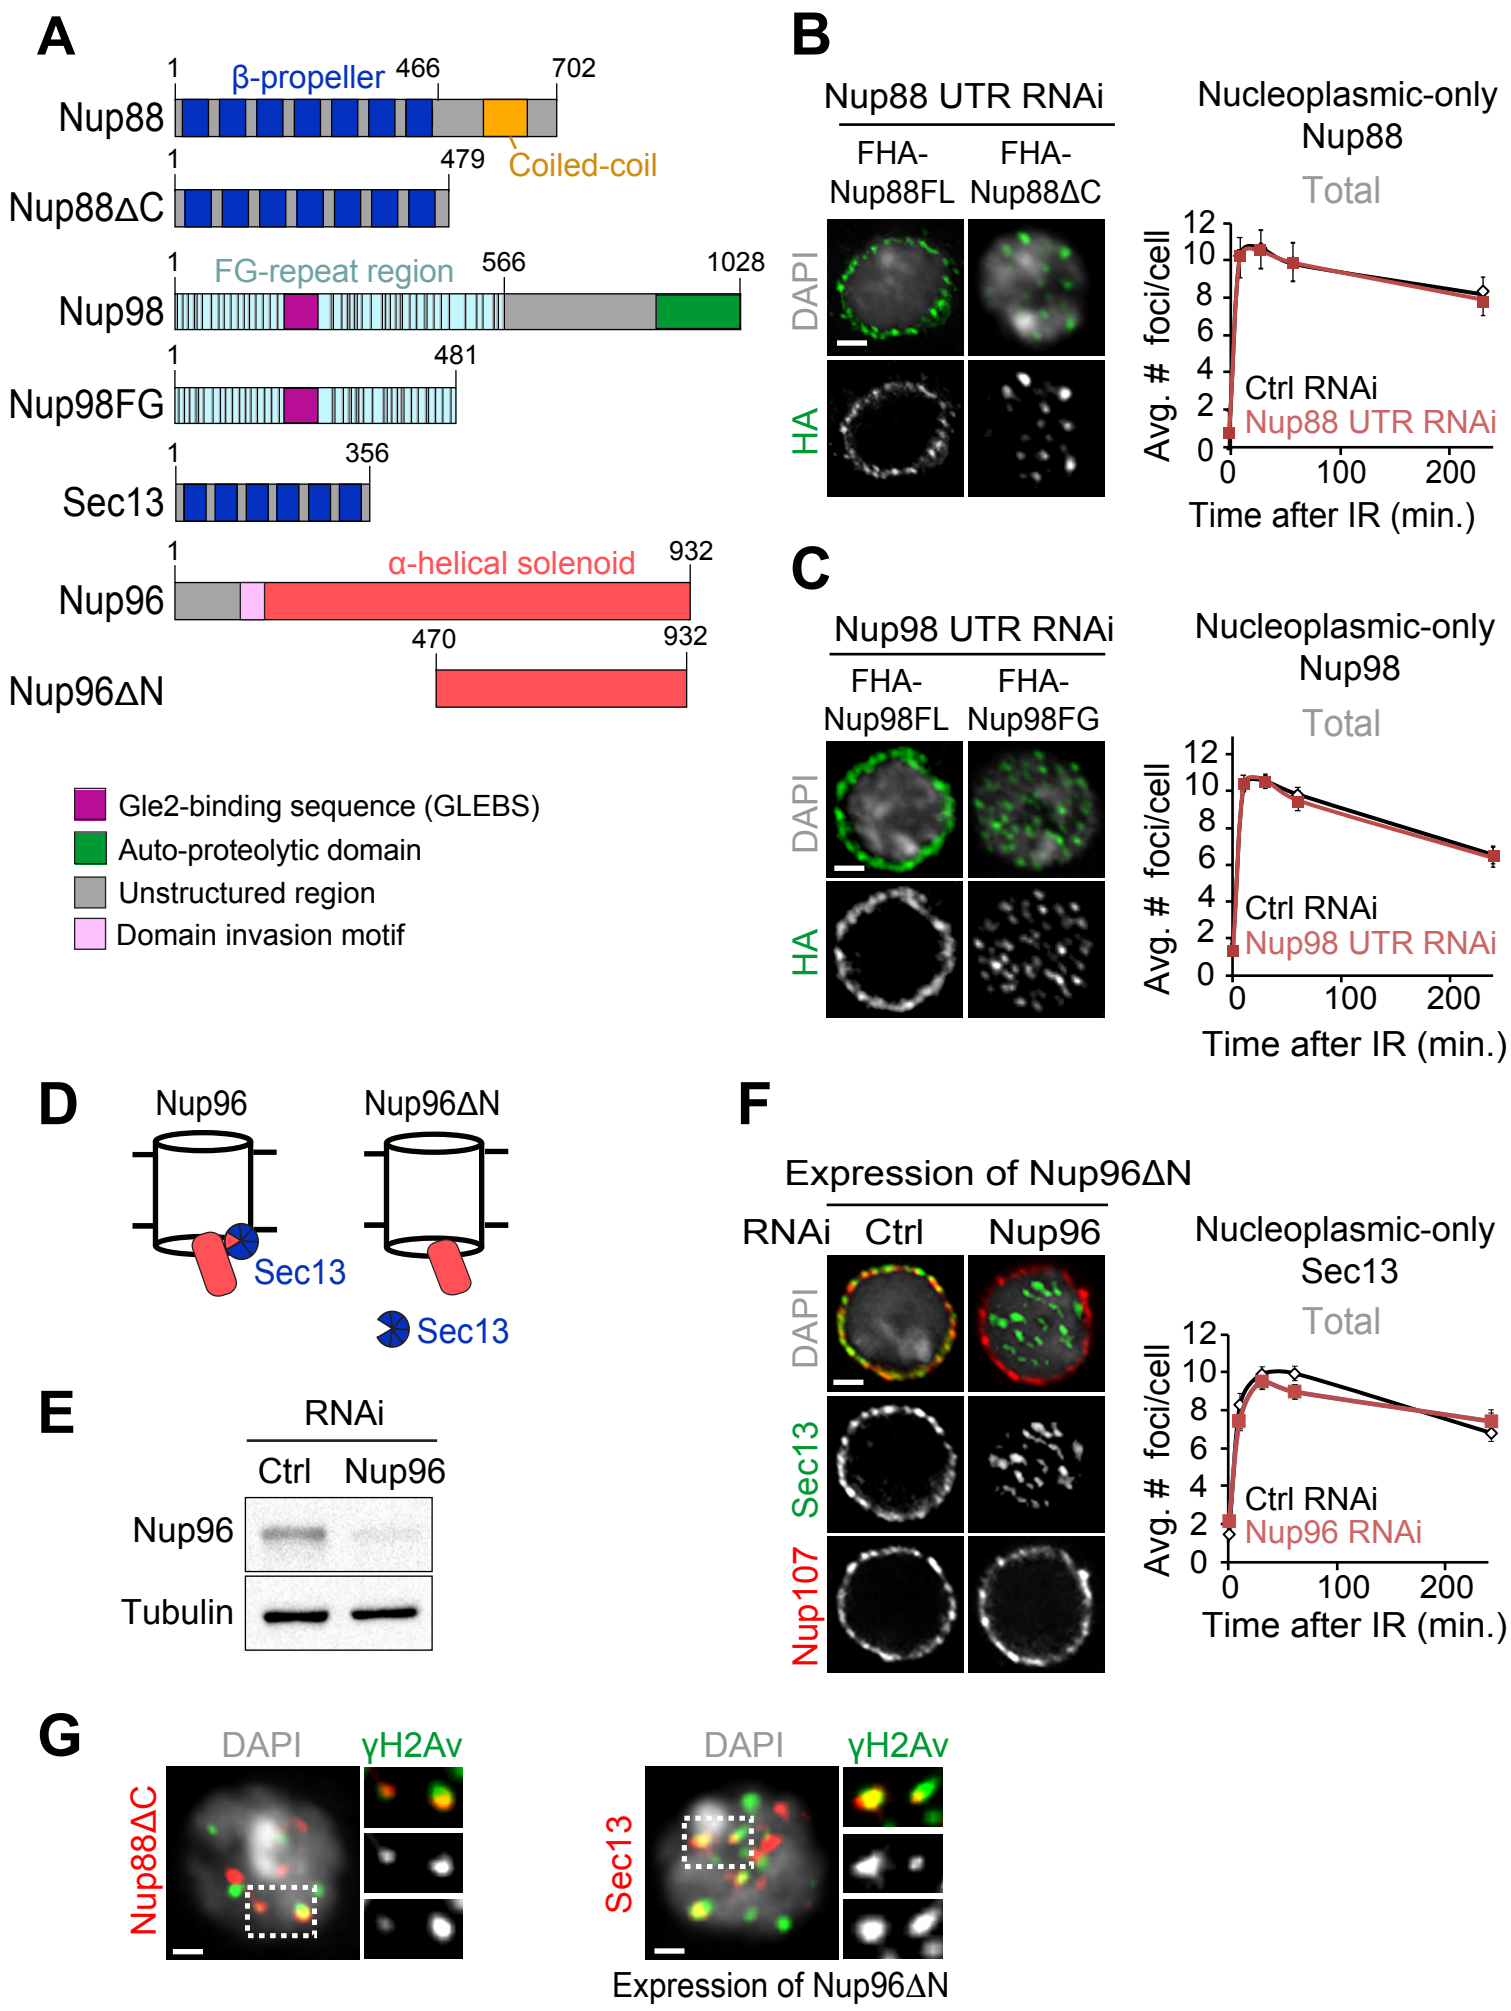

**Figure S4**

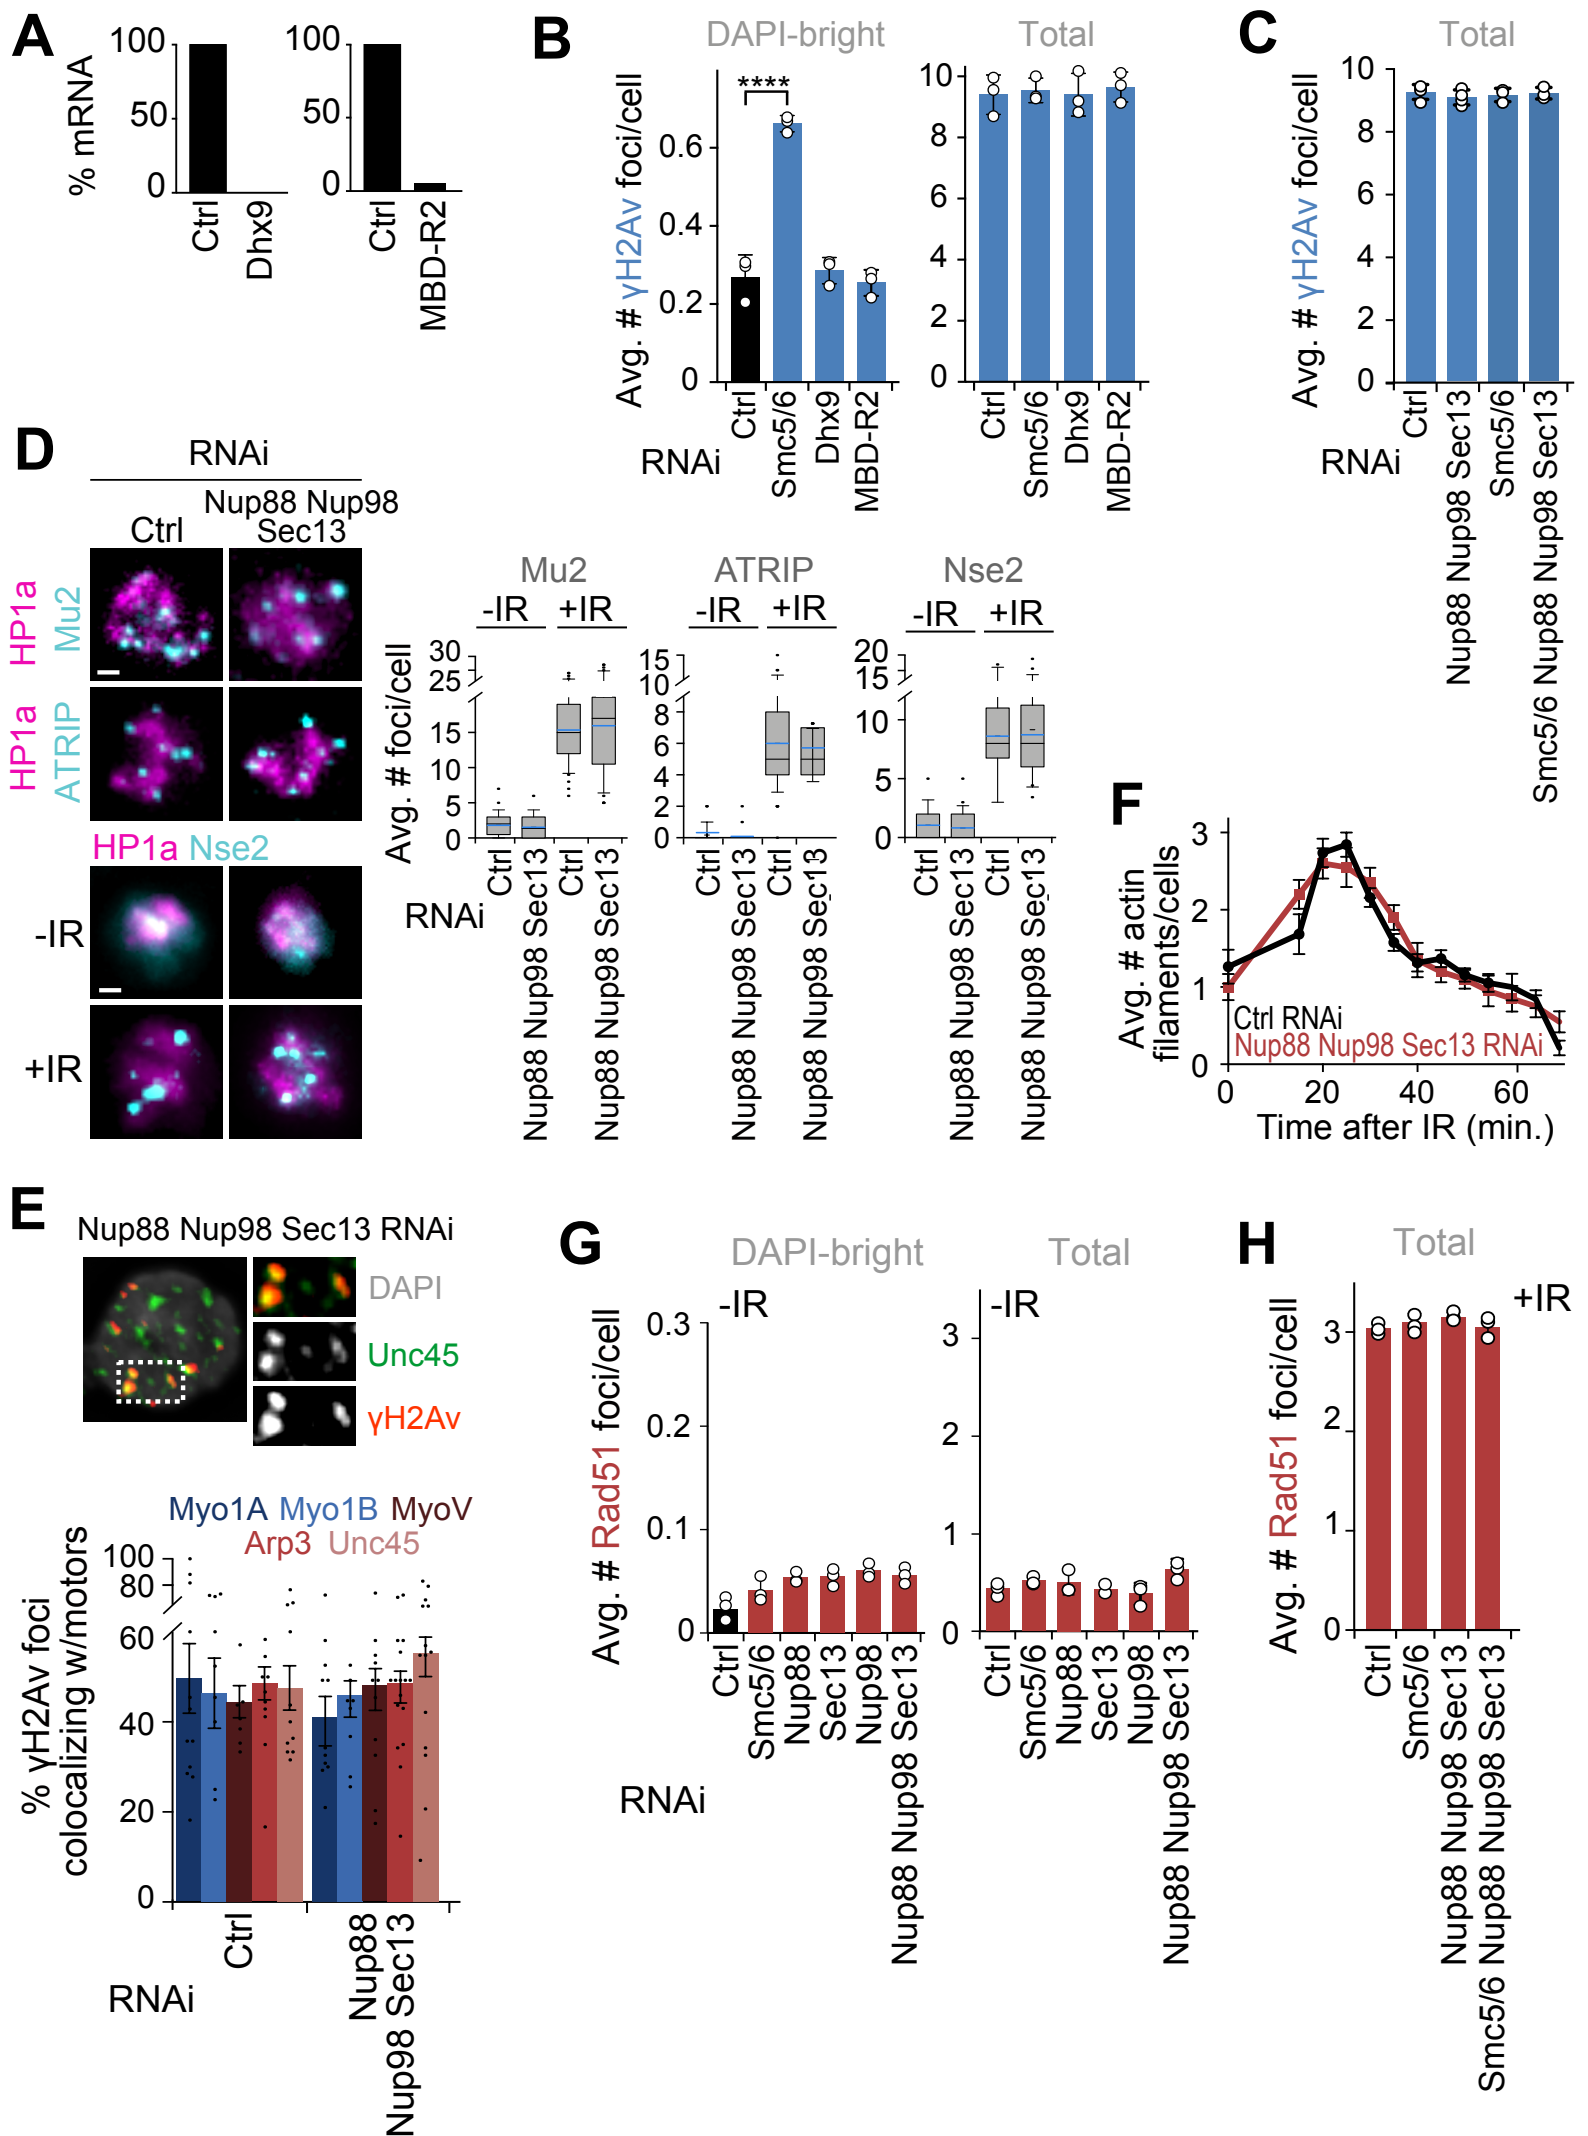

**Figure S5**

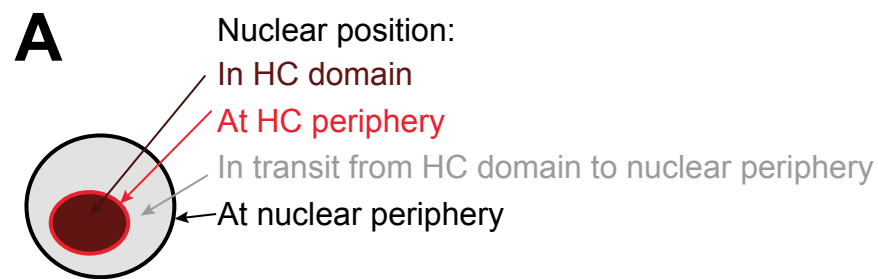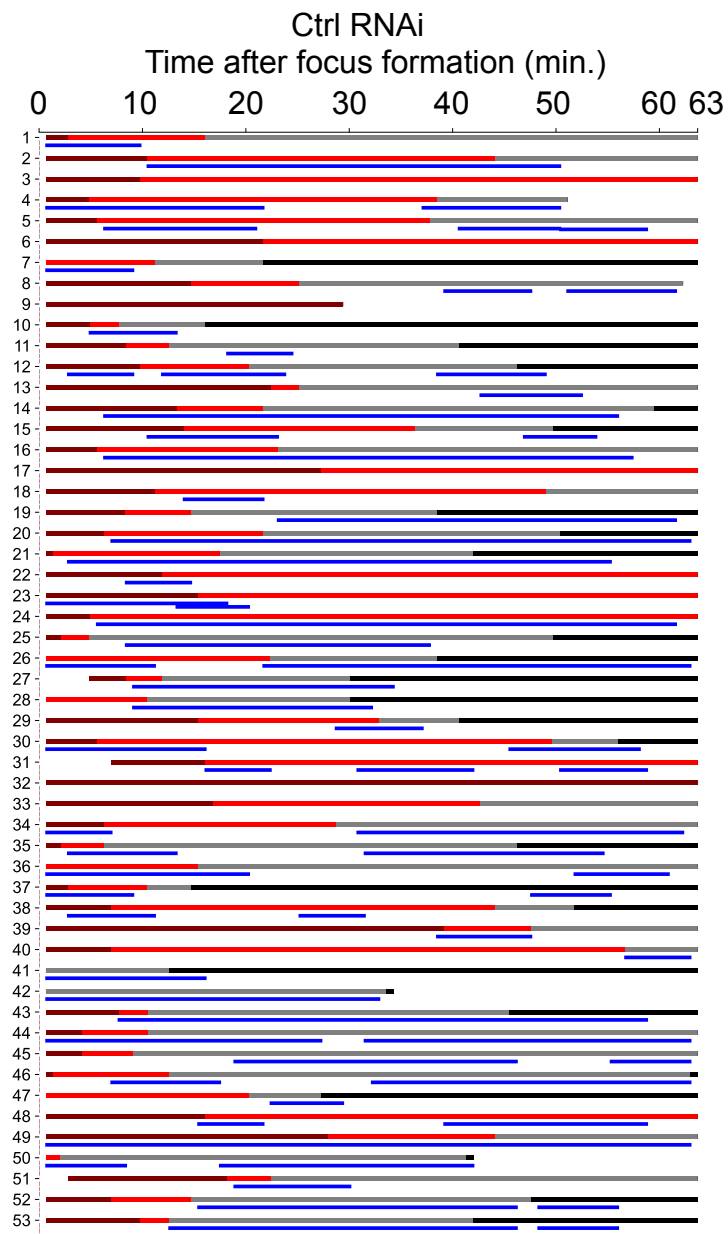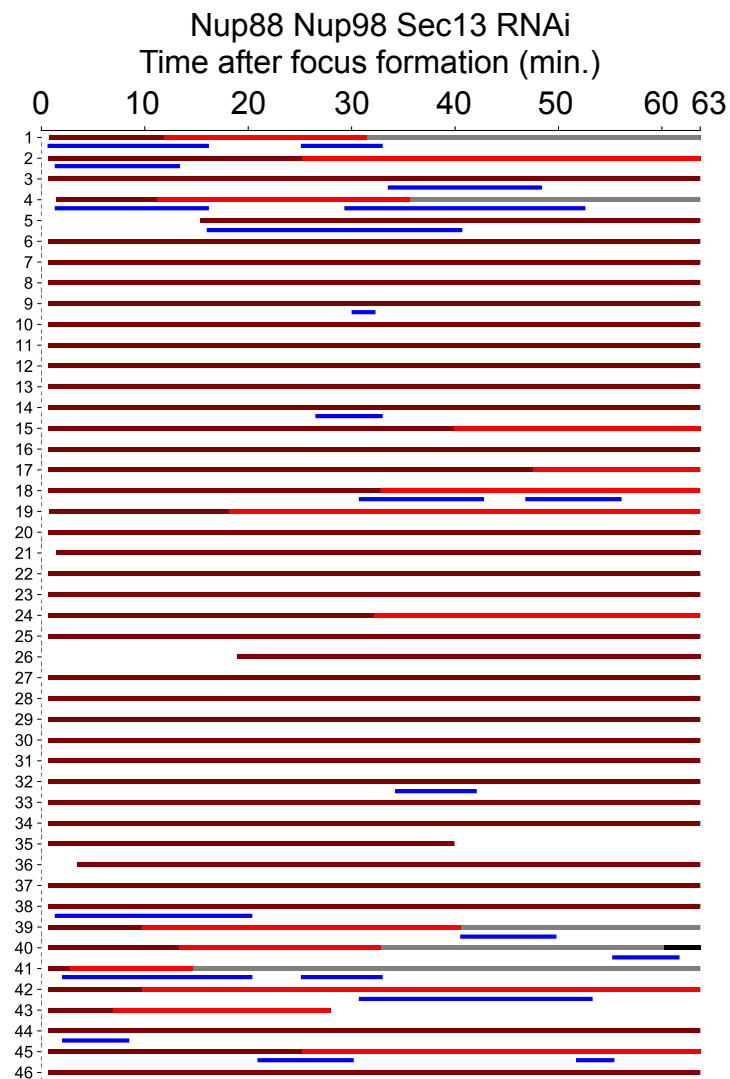

**B** Directed motions

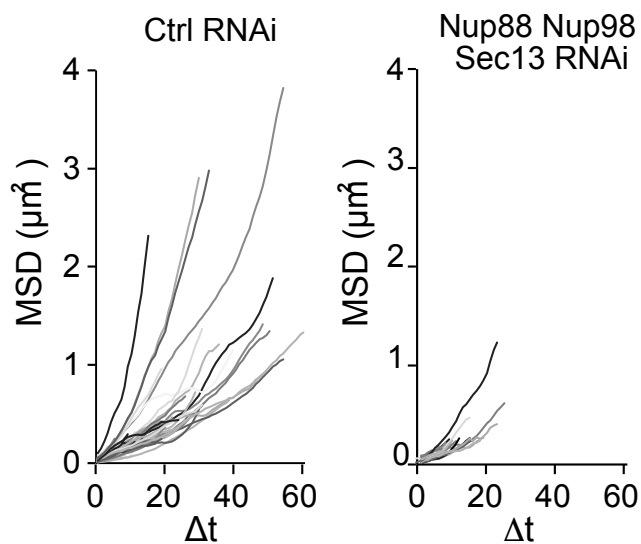

**Figure S6**

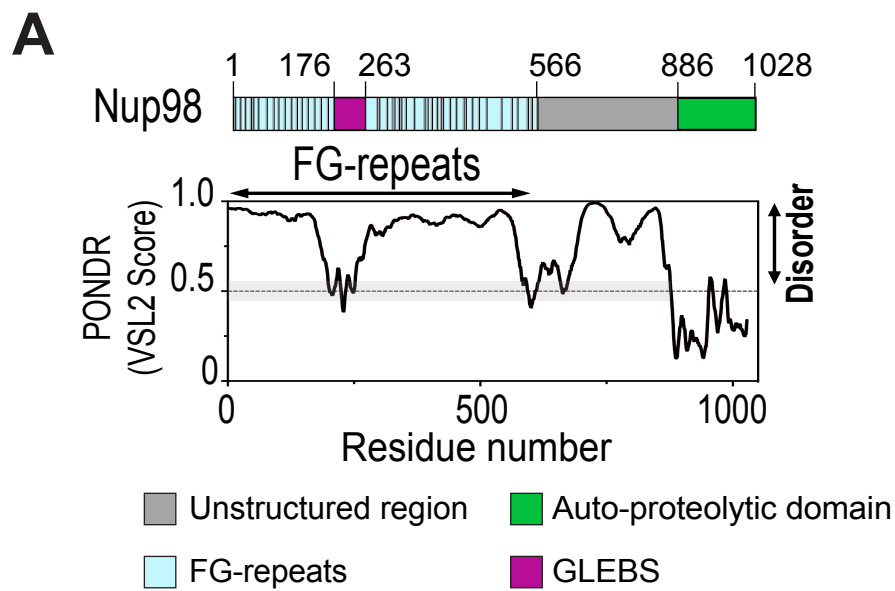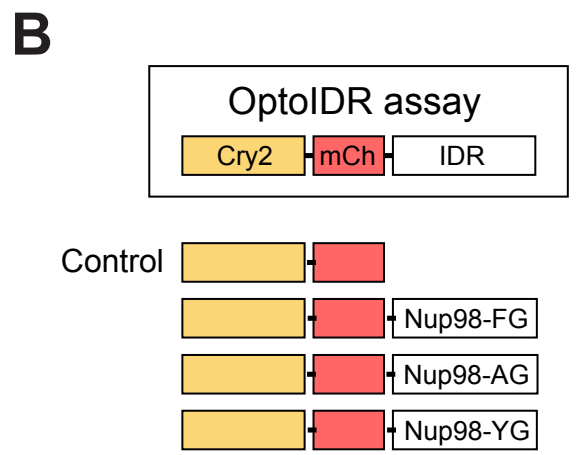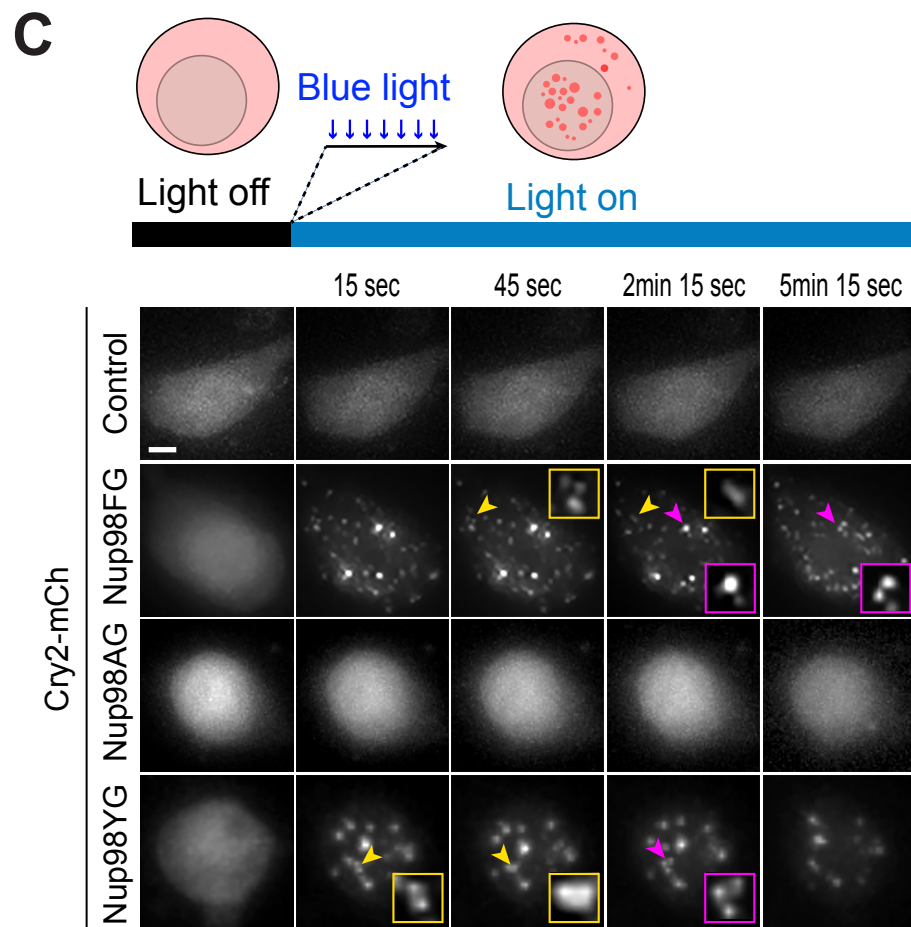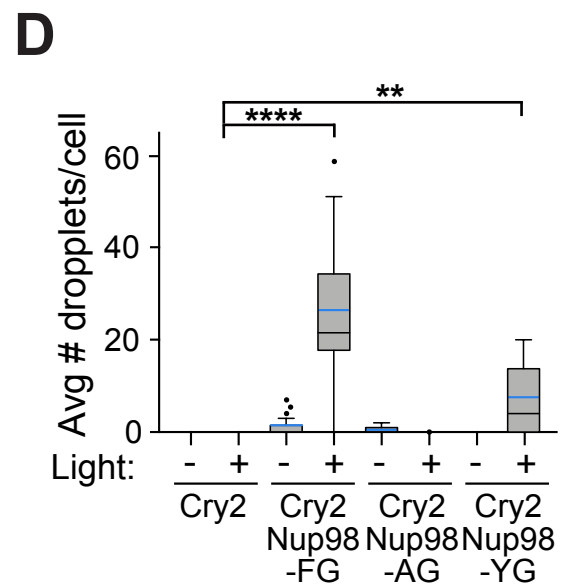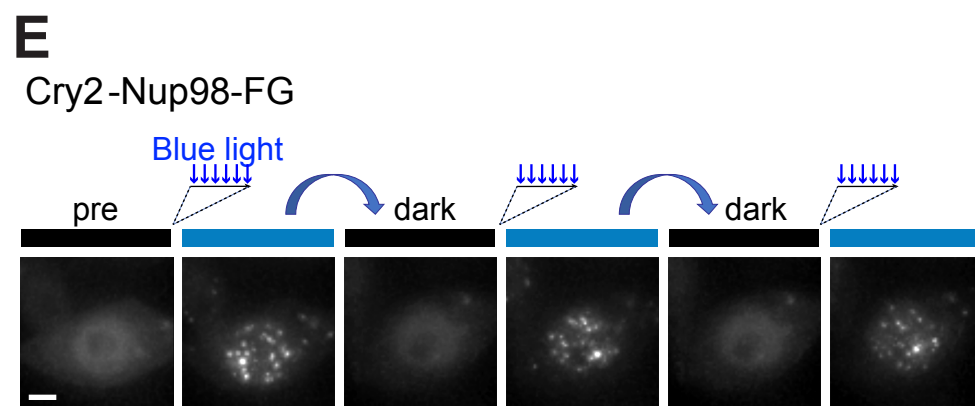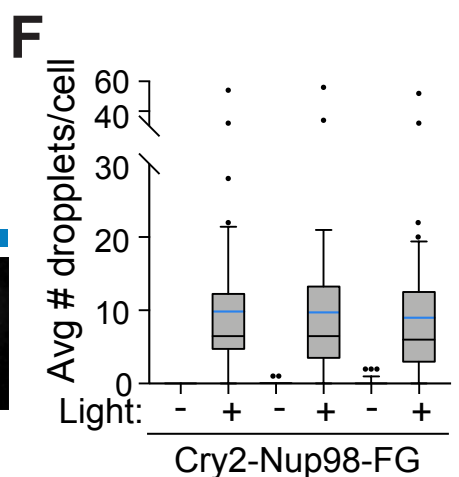

**Figure S7**

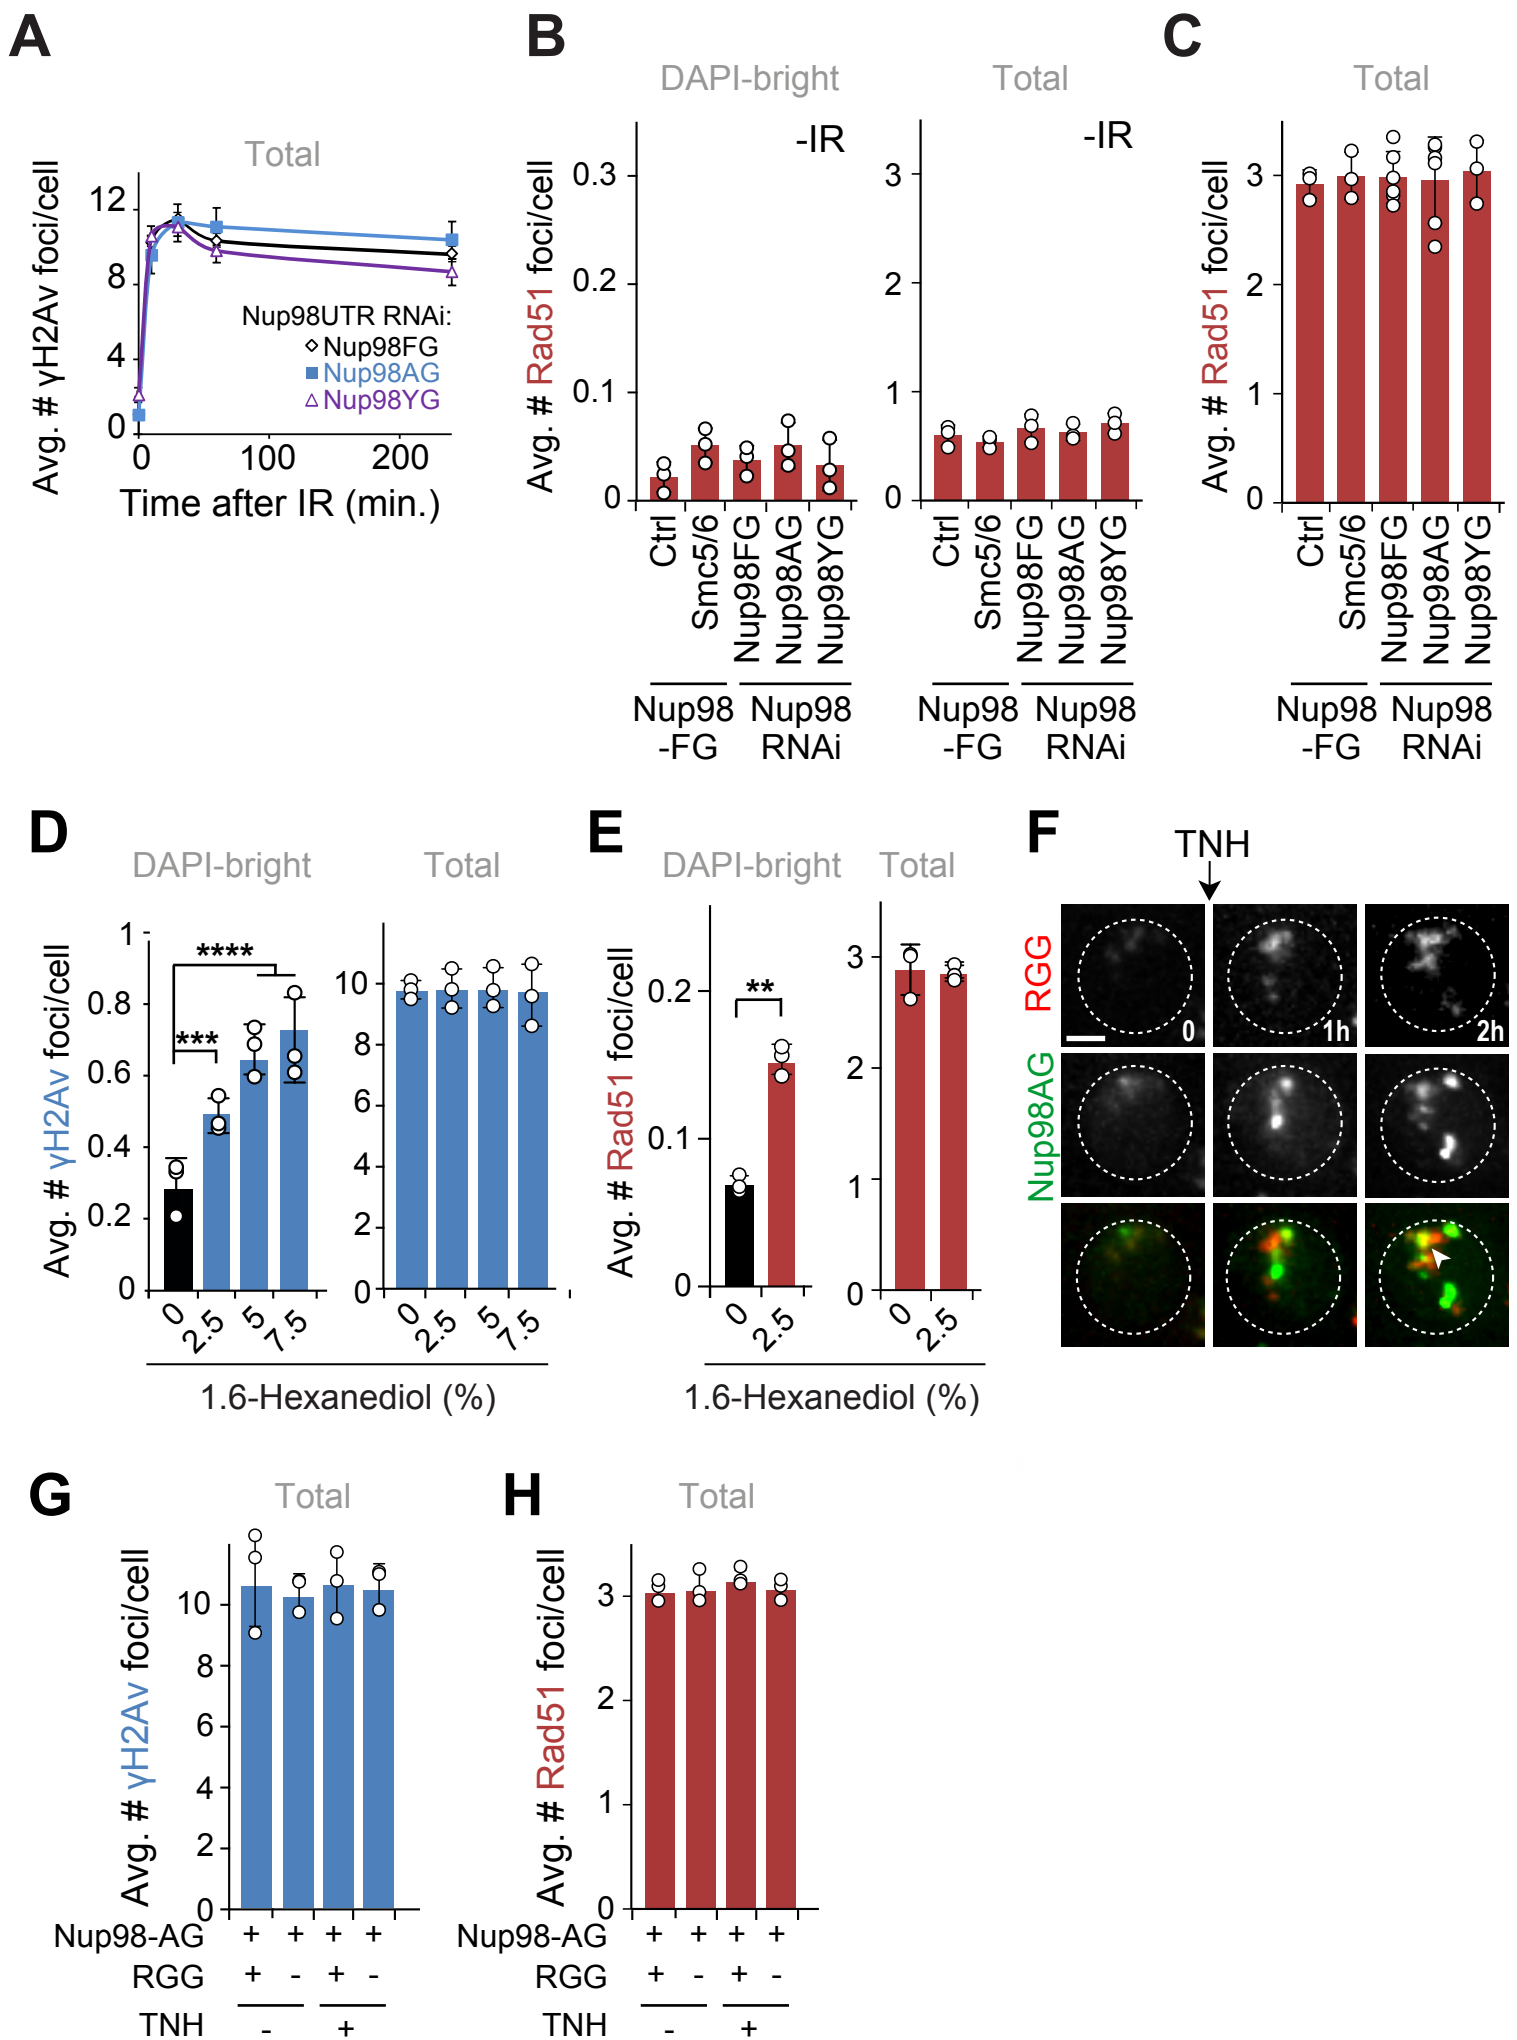

Figure S8



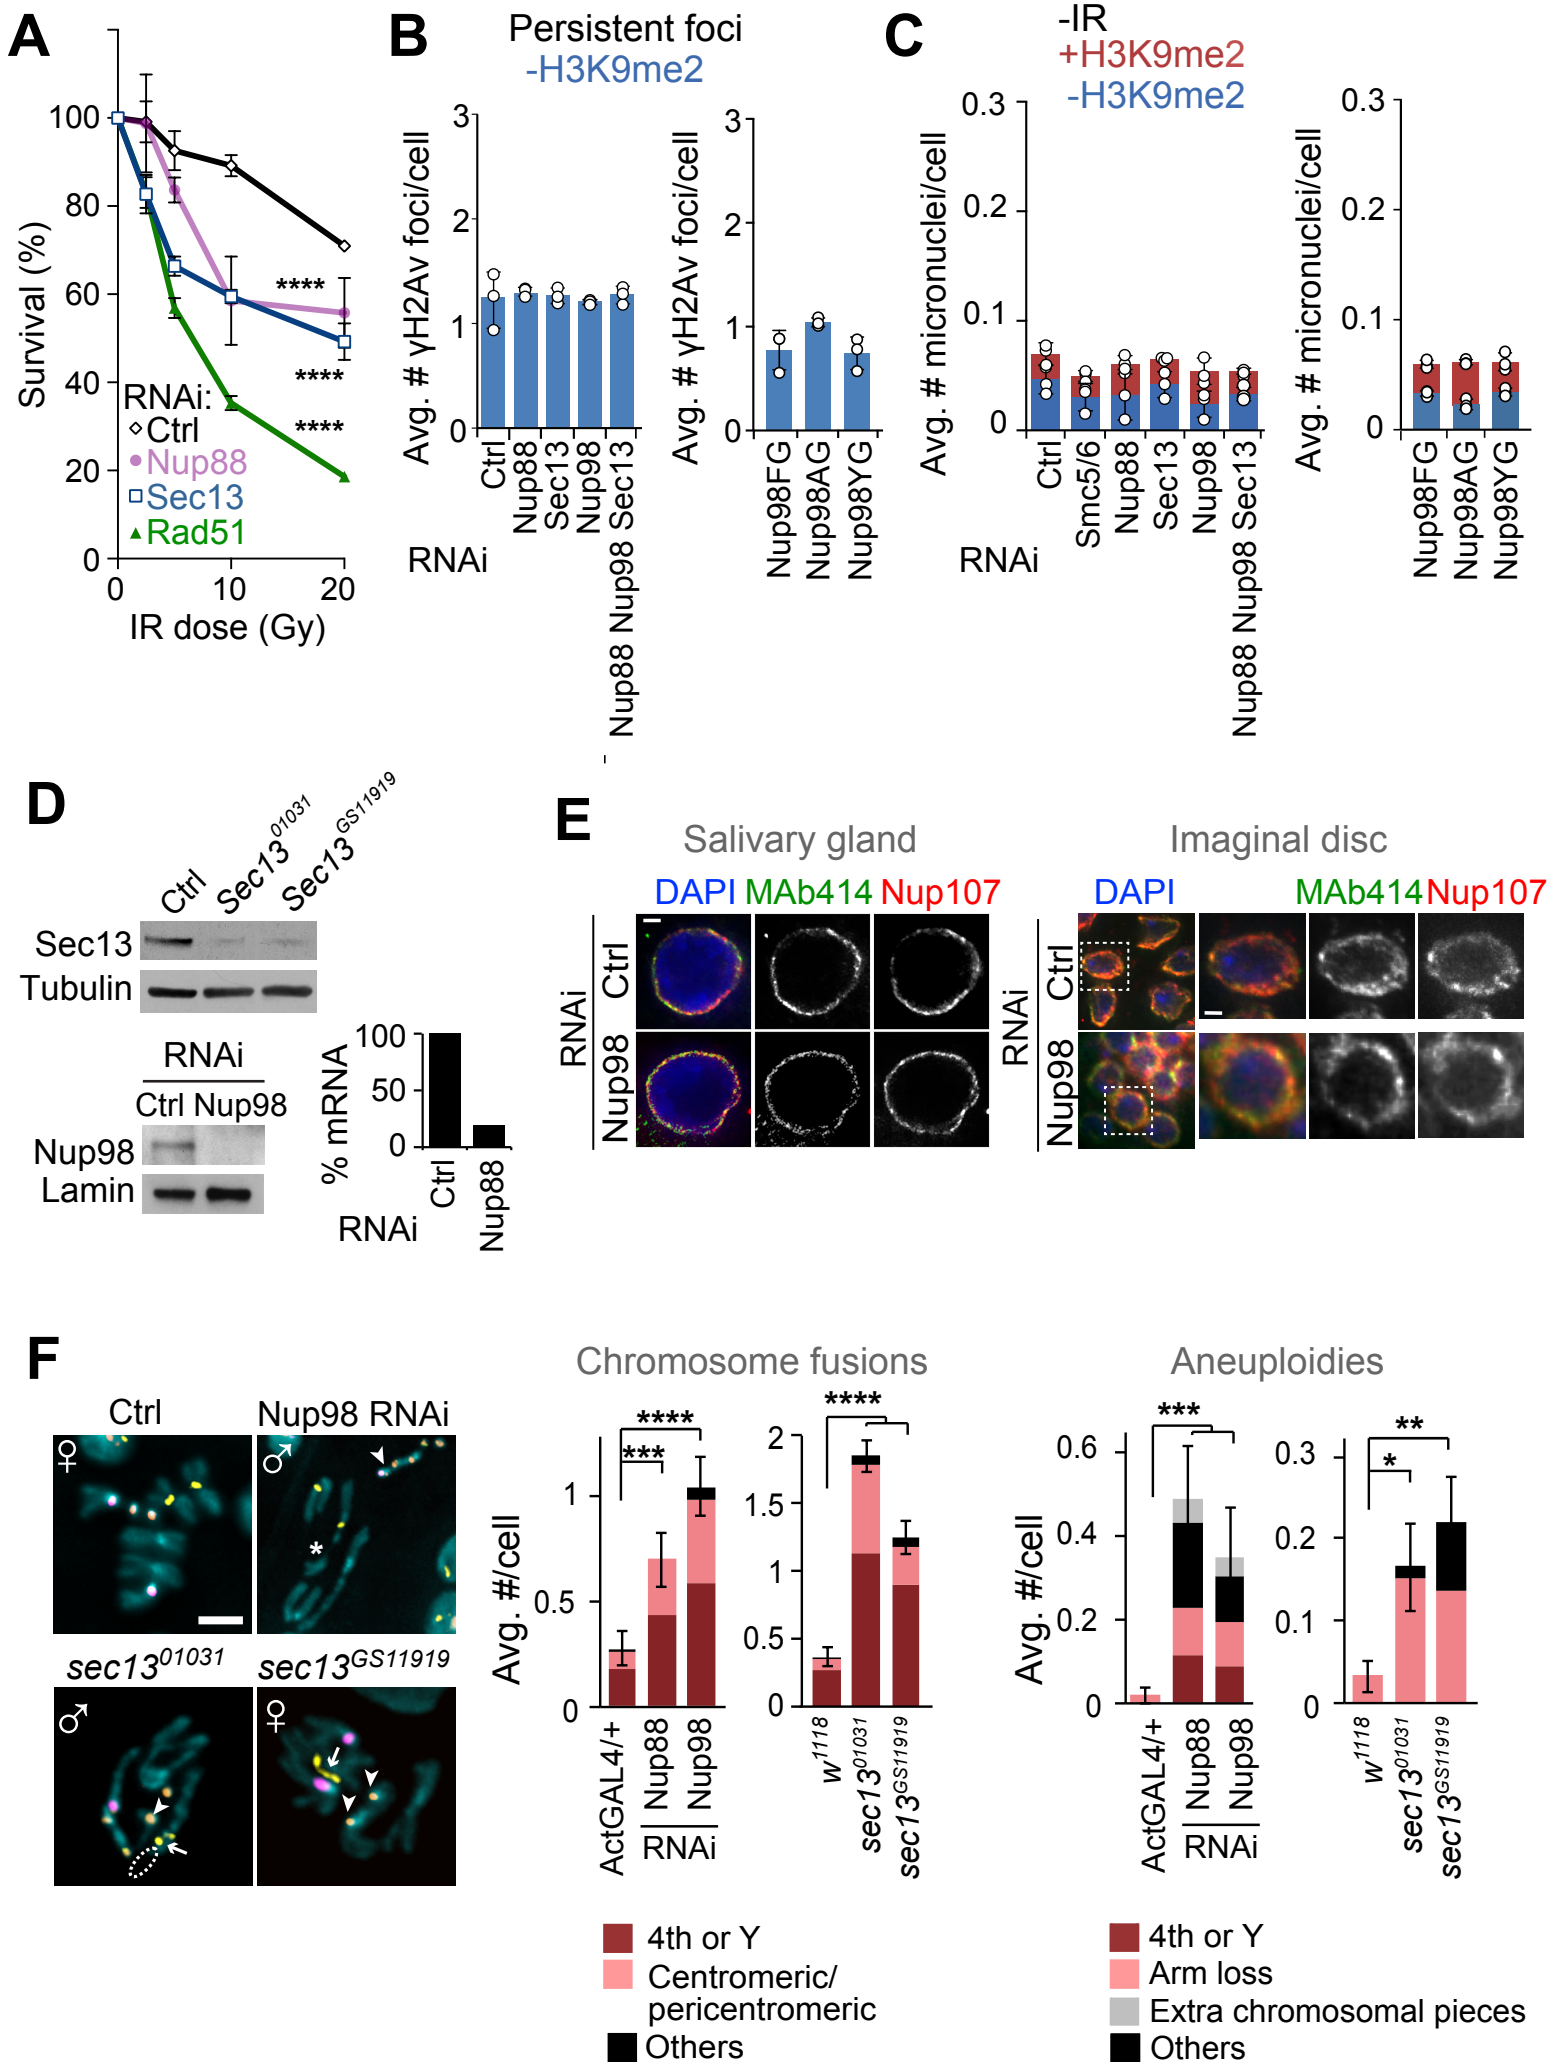

Figure S9
